# Supplementary material for: XROMM kinematics of ventilation in wild turkeys (Meleagris gallopavo)
Source: Oxford University Press journal article supplement (doi:10.1242/jeb.209783), 2019-01-01
Supplement: jeb209783supp.pdf [file jeb209783supp.pdf]

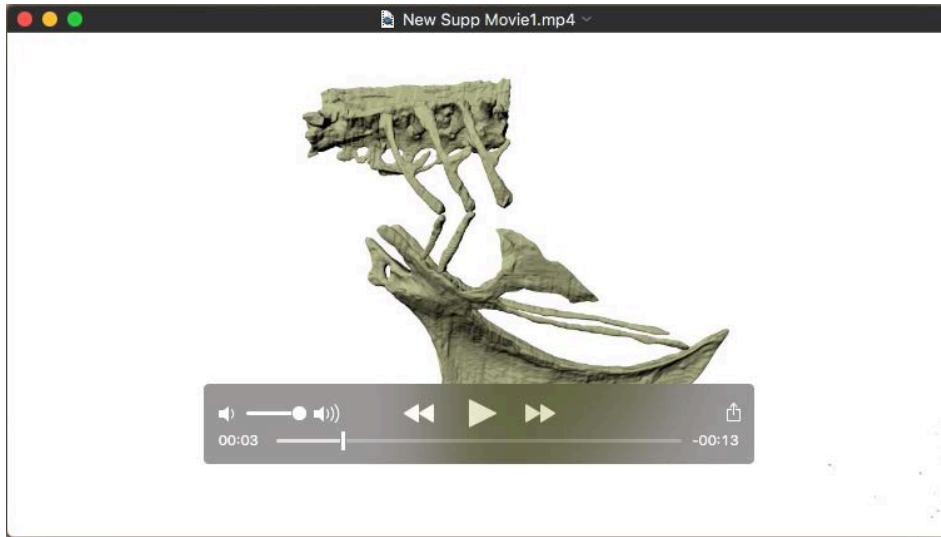

**Movie 1.** XROMM animation of the ribcage of a wild turkey (*Melagris gallopavo*) during ventilation. Playback is at quarter speed.
